# Supplementary material for: Increased Erythrocyte Sedimentation Rate in Dogs: Frequency in Routine Clinical Practice and Association with Hematological Changes
Source: MDPI journal article supplement (doi:10.3390/ani14101409), 2024-05-08
Supplement: s1 [file s1]

**Table S1.** Details of the diseases or conditions recorded in the different groups of samples.

| Group                        | N  | Subgroup                                         | Diseases/ conditions                                                                                                                                                                                                                                            |
|------------------------------|----|--------------------------------------------------|-----------------------------------------------------------------------------------------------------------------------------------------------------------------------------------------------------------------------------------------------------------------|
| Controls                     | 53 | Pre-elective surgery (n=18)                      | Neutering (n=10); Correction of osseous anomalies (n=3); Dental surgery (n=2); Lipoma (n=2); Perineal hernia (n=1)                                                                                                                                              |
|                              |    | Wellness visits/vaccination (n=15)               |                                                                                                                                                                                                                                                                 |
|                              |    | Follow-up of sick animals (n=8)                  | Leishmaniasis after treatment and negative serology (n=3)<br>Previous GI (n=2) or CNS (n=2); Treated Addison's disease (n=1)                                                                                                                                    |
|                              |    | Tumors after chemotherapy of surgery (n=8)       | Mast cell tumor (n=4); Carcinoma (n=2); CLL (n=1) Lymphoma (n=1)                                                                                                                                                                                                |
|                              |    | Diagnostic imaging (n=5)                         | No significant diseases (n=5)                                                                                                                                                                                                                                   |
| Mild chronic disorders       | 53 | Orthopedic disorders (n=13)                      |                                                                                                                                                                                                                                                                 |
|                              |    | Non-neoplastic non-inflammatory neuropathy (n=9) | Peripheral neuropathies (n=7)<br>Idiopathic epilepsy (n=2)                                                                                                                                                                                                      |
|                              |    | Cardiopathy (n=6)                                |                                                                                                                                                                                                                                                                 |
|                              |    | Respiratory disorders (n=6)                      |                                                                                                                                                                                                                                                                 |
|                              |    | Hematologic disorders (n=6)                      | IMTP (n=5), Non-regenerative anemia (n=1)                                                                                                                                                                                                                       |
|                              |    | Dermatopathy (n=5)                               |                                                                                                                                                                                                                                                                 |
|                              |    | Metabolic disorders (n=3)                        | Endocrine diseases (n=2); MGUS (n=1)                                                                                                                                                                                                                            |
|                              |    | Miscellaneous (n=5)                              | Cystitis (n=2); Enteropathy (n=1); Otitis (n=1); Immune-mediated uveitis (n=1)                                                                                                                                                                                  |
| Severe/acute diseases        | 52 | Gastrointestinal signs (n=17)                    | Non specific etiology (n=14); Parvovirus (n=3)                                                                                                                                                                                                                  |
|                              |    | Foreign bodies (n=8)                             | Ingested (n=2); Subcutaneous (n=6)                                                                                                                                                                                                                              |
|                              |    | Acute respiratory distress (n=7)                 | Non specific (n=5); Pulmonary oedema (n=1); Pneumothorax (n=1)                                                                                                                                                                                                  |
|                              |    | Acute trauma (n=5)                               |                                                                                                                                                                                                                                                                 |
|                              |    | Hemoabdomen (n=4)                                |                                                                                                                                                                                                                                                                 |
|                              |    | Neurological signs (n=4)                         | Seizures (n=3); Lipothymia (n=1)                                                                                                                                                                                                                                |
|                              |    | Miscellaneous (n=4)                              | Acute abdomen (n=1); GDV (n=1); Heatstroke (n=1); Pesticide poisoning (n=1)                                                                                                                                                                                     |
|                              |    | Hematologic disorders (n=3)                      | IMHA (n=3)                                                                                                                                                                                                                                                      |
| Tumors                       | 92 | First presentation (n=45)                        | Carcinoma (n=14); Lymphoma (n=11); MCT (n=6); Insulinoma (n=2); Osteosarcoma (n=2); CLL (n=1); Lipoma (n=1); Melanoma (n=1); TVT (n=1); Chemodectoma (n=1); Histiocytic sarcoma (n=1); Splenic sarcoma (n=1); Oral papilloma (n=1); Sertolioma (n=1); STS (n=1) |
|                              |    | During treatments (n=47)                         | Lymphoma (n=23); Carcinoma (n=15); MCT (n=3); Insulinoma (n=2); Histiocytic sarcoma (n=1); Chemodectoma (n=1); STS (n=1); Osteosarcoma (n=1)                                                                                                                    |
| CKD                          | 15 |                                                  |                                                                                                                                                                                                                                                                 |
| Urinary disorders            | 10 | Cystitis and hematuria (n=6)                     |                                                                                                                                                                                                                                                                 |
|                              |    |                                                  |                                                                                                                                                                                                                                                                 |
| Acute/sub-acute inflammation | 20 | Purulent inflammation (n=14)                     | Pyometra (n=4); Purulent inflammation on ulcerated tumors (n=4); Skin abscesses (n=3); Purulent otitis (n=2); Purulent rhinitis (n=1)                                                                                                                           |
|                              |    | Leishmaniasis (n=3)                              |                                                                                                                                                                                                                                                                 |
|                              |    | Miscellaneous (n=3)                              | Odontolithiasis (n=1); Prostatitis (n=1); Systemic mycosis (n=1)                                                                                                                                                                                                |

GI = gastrointestinal; CNS = central nervous system; CLL = chronic lymphocytic leukemia; MGUS = monoclonal gammopathy of unknown significance; MCT = mast cell tumor; TVT = transmissible venereal tumor; STS = soft tissue sarcoma; CKD = chronic kidney disease; IMTP = immune-mediated thrombocytopenia; IMHA = immune-mediated hemolytic anemia.
